# Supplementary material for: The tomato subtilase family includes several cell death-related proteinases with caspase specificity
Source: PubMed Central journal article supplement (PMC6043521; doi:10.1038/s41598-018-28769-0), 2018-07-12
Supplement: 41598_2018_28769_MOESM1_ESM.pdf [file 41598_2018_28769_MOESM1_ESM.pdf]

**The tomato subtilase family includes several cell death-related proteinases with caspase specificity**

Sven Reichardt, Dagmar Repper, Alexander I. Tuzhikov, Raisa A. Galiullina, Marc Planas-Marqués, Nina V. Chichkova, Andrey B. Vartapetian, Annick Stintzi and Andreas Schaller

|                                                                 |            |
|-----------------------------------------------------------------|------------|
| <b>1. Supporting text: Nomenclature of P69 subtilases .....</b> | <b>S-2</b> |
| <b>2. Table S1 .....</b>                                        | <b>S-3</b> |
| <b>3. Table S2 .....</b>                                        | <b>S-4</b> |
| <b>4. Figure S1 .....</b>                                       | <b>S-5</b> |
| <b>5. Supporting references .....</b>                           | <b>S-6</b> |

### **Supporting text: Nomenclature of P69 subtilases**

There is considerable confusion in the literature with respect to the naming of individual members of the P69 clade (cf. Figure 2). In an attempt to resolve these issues, we now propose a new nomenclature for P69 subtilases.

In 1999, we performed a first analysis of the subtilase gene family in tomato (1). Twelve new tomato subtilases were described including four that were closely related to P69A and P69B that had previously been characterized by Tornero *et al* (2,3). Therefore, these four new members of the P69 clade had been named P69C (acc. number AJ005171), P69D (AJ006786), P69E (AJ005172), and P69F (AJ005173). At about the same time Jordá *et al.* described a genomic cluster containing four genes in addition to P69A and B and, consequently, they also named these genes P69C, D, E and F (4,5). Of these four genes, only P69C was identical between the studies of Meichtry *et al.* and Jordá *et al.* and the names for P69D, E, and F were ambiguous.

The sequence described by Meichtry *et al.* as P69D was distinct but very similar in sequence to P69A. It now becomes clear that the differences between these two sequences are due to sequencing errors in the originally reported P69A sequence. These two sequences correspond to the same tomato gene with the identifier Solyc08g079840. We now refer to Solyc08g079840 as P69A and to Solyc08g079850 as P69D. With respect to the naming of P69E and P69F we keep the nomenclature proposed by Jordà and coworkers. Therefore, P69F of Meichtry *et al.* (AJ005173) which is identical to P69D has to be renamed as P69D. P69E of Meichtry *et al.* (AJ005172) is different from any of the other genes and has not been annotated in the tomato genome. This gene is now referred to as P69K. The names for all members of the P69 clade with the corresponding Solyc IDs are shown in Figure 2.

**Table S1.** Oligonucleotide primers for cloning of expression constructs

| name            | sequence (5' to 3')                                    | restriction site |
|-----------------|--------------------------------------------------------|------------------|
| Phyt1-1f        | GGGGTACCATGGCTAACTATATTGCCTTATG                        | <i>KpnI</i>      |
| Phyt1-2247r-His | CCGGATCCTTAATGGTGATGATGATGGTGACAGAGGTTCCACTCTTATGGTAGT | <i>BamHI</i>     |
| Phyt1-2420r     | CCGGATCCTGTCTGAGCTGTCTTGTTGGA                          | <i>BamHI</i>     |
| -84-Phyt2f      | CCCTCGAGTGGCTTCCCATACTCTCACTTGT                        | <i>XhoI</i>      |
| Phyt2-2253r-His | CCTCTAGATCAATGGTGATGATGATGGTGTTATGCTCTCAAAGGATCCAC     | <i>XbaI</i>      |
| Phyt2-2465r     | CCGGTACCCAGAGTCTGAAGTAATCTGCAAGT                       | <i>KpnI</i>      |
| Phyt3-1f        | GGCTCGAGATGGAATTAGTTAAAGGAGTGCCT                       | <i>XhoI</i>      |
| Phyt3-2327r     | GGTCTAGATTACTCTAGTTCTTTATGTACCTTCTTCT                  | <i>XbaI</i>      |
| Phyt4-1f        | GGCTCGAGATGGGATTCTTATTGTTCTTATTGTTCC                   | <i>XhoI</i>      |
| Phyt4-2247r-His | GGTCTAGATTAATGGTGATGATGATGGTGCCAAGTACGGATCATTGGTGCA    | <i>XbaI</i>      |
| Phyt4-2297r     | GGTCTAGAGAACCTTTAAACTCATAGTCTAAAAATGC                  | <i>XbaI</i>      |
| Phyt5-1f        | GGCTCGAGATGGGATTCTTTTTGTTCTTATTGTTCC                   | <i>XhoI</i>      |
| Phyt5-2250r-His | GGTCTAGATCAATGGTGATGATGATGGTGTGACCAAGTATGGATCATTGGTG   | <i>XbaI</i>      |
| Phyt5-2406r     | GGTCTAGATTTGTAAGTGTAGTTACTTACTTCATATTTGCC              | <i>XbaI</i>      |
| Phyt6-1f        | GGCTCGAGATGGATCTGAAATTGATCAGTTTAATCT                   | <i>XhoI</i>      |
| Phyt6-2193r     | GGTCTAGATTACATTTTTAAAATGCTATGCGGAAATA                  | <i>XbaI</i>      |
| P69A-1f         | GGGGATCCATGGGATTCTTGAAAATCCTTCTTGT                     | <i>BamHI</i>     |
| P69A-2244r-His  | GGTCTAGATTAATGGTGATGATGATGGTGTTGGATCAACAAAAGTGCAATTGG  | <i>XbaI</i>      |

**Table S2.** Oligonucleotide primers for qPCR

| target           | locus ID       | name        | sequence (5' to 3')      |
|------------------|----------------|-------------|--------------------------|
| S/Phyt1          | Solyc12g088760 | Phyt1-636f  | TACAGCTGCAGGAAGTCGTGTTGA |
|                  |                | Phyt1-809r  | TCCACTCCATCCTCAATTGCCTGA |
| S/Phyt2          | Solyc04g078740 | Phyt2-2153f | TTGATGGTTCATTGAGCTGGA    |
|                  |                | Phyt2-2341r | CAGAGTCTGAAGTAATCTGCAAGT |
| S/Phyt3          | Solyc04g078730 | -96-Phyt3f  | CAATGCTCCATGCCCTTAGTA    |
|                  |                | Phyt3-153r  | AGAGTGCCATTGCTCATGACT    |
| S/Phyt4          | Solyc04g078710 | -183-Phyt4f | GCTTAACAATGCACCATGGCA    |
|                  |                | Phyt4-20r   | TCGGCATGAATGACTTGCCA     |
| S/Phyt5          | Solyc04g078720 | Phyt5-2166f | CGGATCGATAACTTGGGTGG     |
|                  |                | Phyt-52305r | TTGCCCTCACAATCTAAAAATGGA |
| S/Phyt6          | Solyc02g072290 | Phyt6-848f  | ATTCTTAGCAATTGGCGCA      |
|                  |                | Phyt6-1056r | TGGTTGATAGGCAGATTCGC     |
| S/P69A           | Solyc08g079840 | P69A-2384f  | CTGCTTCAATGTTTGTTCACACC  |
|                  |                | P69A-2590r  | GTC AAGACTCAAAGGATGGGG   |
| S/SBT4A          | Solyc01g087780 | SBT4A-1325f | GATCCAGCAGTGTTCCAGGGT    |
|                  |                | SBT4A-1512r | GGCCCTCGTGATGAGTATCC     |
| EF1-alpha        | Solyc06g009960 | elf1a-1272f | AGCCCATGGTTGTTGAGACCTTTG |
|                  | Solyc06g009970 | elf1a-1461r | TTCGAAACACCAGCATCACACTGC |
| ubiquitin3       | Solyc01g056940 | ubi3-230f   | CTCTTGCCGACTACAACATCC    |
|                  |                | ubi3-451r   | AGCACC GCACTCAGCATT A    |
| $\beta$ -tubulin | Solyc04g081490 | b-tub-317f  | TAGAGCCTGGTACGATGGATAG   |
|                  |                | b-tub-450r  | CAACTCAGCGCCTTCAGTATAA   |

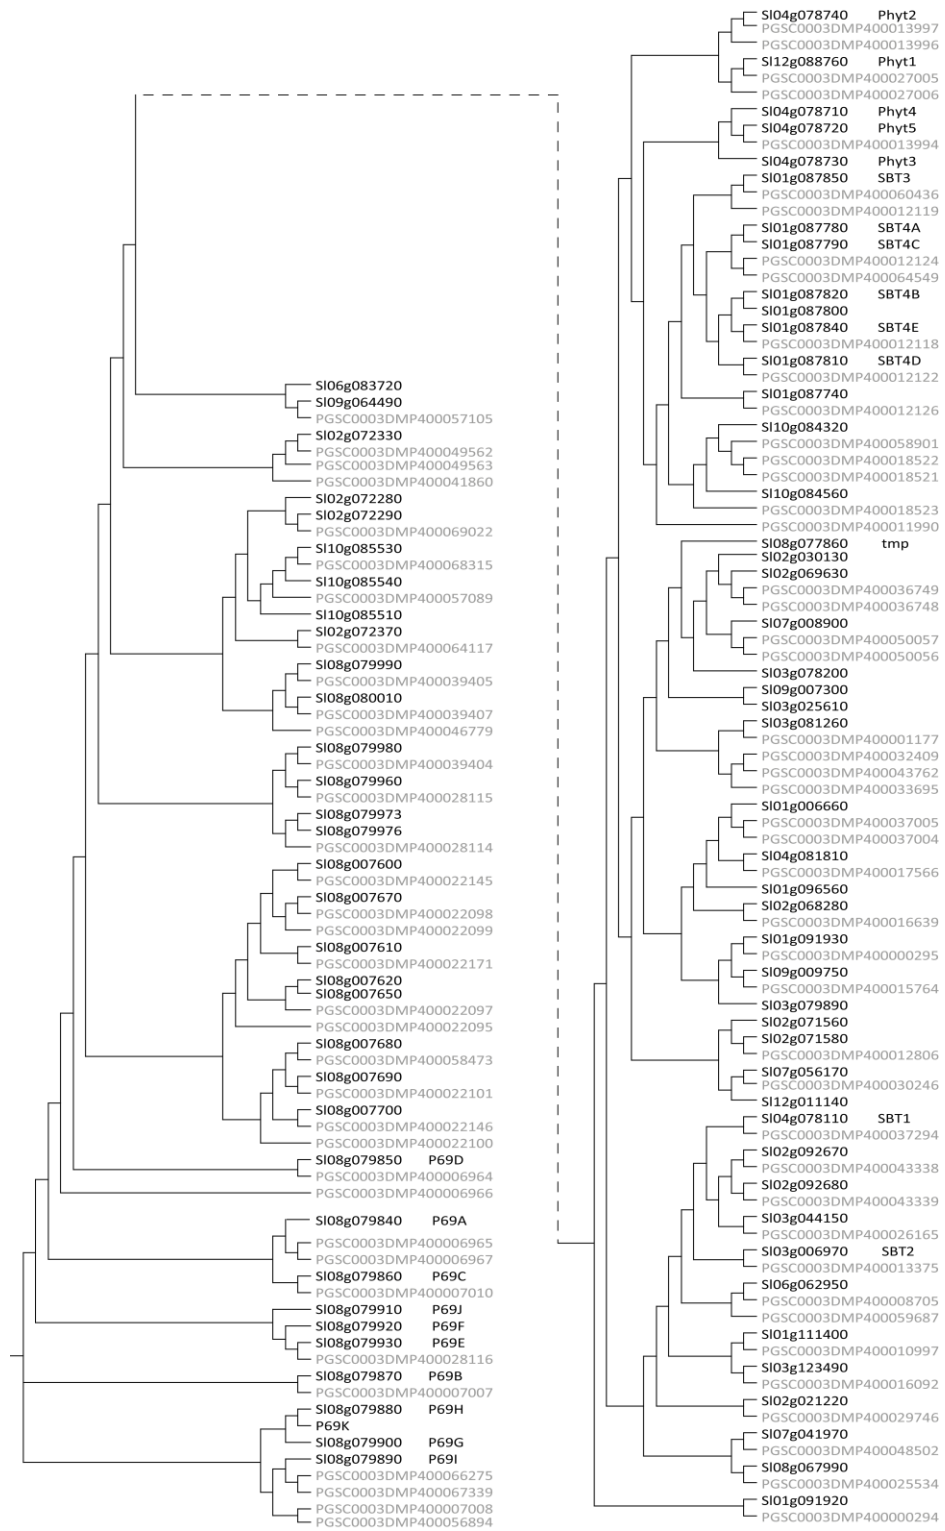

**Figure S1. Phylogenetic comparison of tomato and potato SBTs.** The 82 tomato SBT sequences were aligned with SBT sequences deduced from the 74 potato genes and a neighbor-joining tree was calculated in ClustalX. Tomato SBTs are shown in black, potato identifiers in gray.

## Supporting References

1. Meichtry, J., Amrhein, N., and Schaller, A. (1999) Characterization of the subtilase gene family in tomato (*Lycopersicon esculentum* Mill.). *Plant Mol. Biol.* **39**, 749-760
2. Tornero, P., Conejero, V., and Vera, P. (1996) Primary structure and expression of a pathogen-induced protease (PR-P69) in tomato plants: Similarity of functional domains to subtilisin-like endoproteases. *Proc. Natl. Acad. Sci. USA* **93**, 6332-6337
3. Tornero, P., Conejero, V., and Vera, P. (1997) Identification of a new pathogen-induced member of the subtilisin-like processing protease family from plants. *J. Biol. Chem.* **272**, 14412-14419
4. Jordá, L., Coego, A., Conejero, V., and Vera, P. (1999) A genomic cluster containing four differentially regulated subtilisin-like processing protease genes in tomato plants. *J. Biol. Chem.* **274**, 2360-2365
5. Jordá, L., Conejero, V., and Vera, P. (2000) Characterization of P69E and P69F, two differentially regulated genes encoding new members of the subtilisin-like proteinase family from tomato plants. *Plant Physiol.* **122**, 67-74
